# Supplementary material for: Unbiased estimates of cerebrospinal fluid β-amyloid 1–42 cutoffs in a large memory clinic population
Source: Springer Nature journal article supplement (doi:10.1186/s13195-016-0233-7), 2017-02-13
Supplement: MOESM1 [file 12066176]

Unbiased estimates of CSF beta amyloid 1-42 cut-off in a large memory clinic population

Daniela Bertens, MD; Betty M. Tijms, PhD; Philip Scheltens MD, PhD; Charlotte E. Teunissen PhD; Pieter Jelle Visser MD, PhD.

Supplementary tables and figures

**Supplementary Table 1.** Distribution of diagnosis per year of CSF collection

| Year | Subjective complaints | MCI         | Probable AD  | Dementia other |
|------|-----------------------|-------------|--------------|----------------|
| 2001 | 4 (11.76%)            | 12 (35.29%) | 11 (32.35%)  | 7 (20.59%)     |
| 2002 | 8 (13.33%)            | 17 (28.33%) | 26 (43.33%)  | 9 (15%)        |
| 2003 | 11 (13.10%)           | 24 (28.57%) | 37 (44.05%)  | 12 (14.29%)    |
| 2004 | 17 (20%)              | 18 (21.18%) | 30 (35.29%)  | 20 (23.53%)    |
| 2005 | 10 (10.42%)           | 20 (20.83%) | 39 (40.63%)  | 27 (28.13%)    |
| 2006 | 20 (13.70%)           | 32 (21.92%) | 62 (42.47%)  | 32 (21.92%)    |
| 2007 | 38 (20.77%)           | 26 (14.21%) | 83 (45.36%)  | 36 (19.67%)    |
| 2008 | 37 (17.79%)           | 40 (19.23%) | 95 (45.67%)  | 36 (17.31%)    |
| 2009 | 50 (19.46%)           | 51 (19.84%) | 100 (38.91%) | 56 (21.79%)    |
| 2010 | 38 (20%)              | 35 (18.42%) | 79 (41.58%)  | 38 (20%)       |
| 2011 | 68 (25.56%)           | 58 (21.80%) | 98 (36.84%)  | 42 (15.79%)    |
| 2012 | 37 (14.98%)           | 51 (20.65%) | 101 (40.89%) | 58 (23.48%)    |
| 2013 | 50 (19.08%)           | 54 (20.61%) | 112 (42.75%) | 46 (17.56%)    |
| 2014 | 40 (19.23%)           | 31 (14.90%) | 88 (42.31%)  | 49 (23.56%)    |
| 2015 | 19 (14.84%)           | 21 (16.41%) | 66 (51.56%)  | 22 (17.19%)    |

**Supplementary Table 2.** Baseline characteristics according to time of CSF collection

| 2001-2007                      | All (n=654)  | SCD (n=104) | MCI (n=137) | AD-type dementia (n=277) | Non-AD type dementia (n=136) |
|--------------------------------|--------------|-------------|-------------|--------------------------|------------------------------|
| Age (years)                    | 68.3 (8.0)   | 64.8 (7.5)  | 70.1 (7.4)  | 68.9 (8.1)               | 68 (7.8)                     |
| Females (%)                    | 360 (55%)    | 64 (62%)    | 82 (60%)    | 133 (48%)                | 81 (60%)                     |
| Years of education             | 4.8 (1.4)    | 5.3 (1.4)   | 4.8 (1.4)   | 4.7 (1.4)                | 4.6 (1.5)                    |
| MMSE score                     | 23.7 (5.2)   | 28.4 (1.8)  | 26.5 (2.7)  | 21.1 (4.9)               | 22.8 (5.8)                   |
| APOE-ε4 allele carriers, n (%) | 308 (47%)    | 36 (35%)    | 59 (43%)    | 174 (63%)                | 39 (29%)                     |
| CSF aβ 1-42 (pg/ml)            | 592 (257)    | 796 (237)   | 581 (251)   | 463 (169)                | 711 (274)                    |
| CSF tau (pg/ml)                | 563(397)     | 327 (236)   | 546 (398)   | 728 (418)                | 429 (295)                    |
| CSF ptau (pg/ml)               | 74 (39)      | 52 (23)     | 75 (40)     | 92 (39)                  | 55.15 (27)                   |
| 2008-2015                      | All (n=1766) | SCD (n=339) | MCI (n=341) | AD-type dementia (n=739) | Non-AD type dementia (n=347) |
| Age (years)                    | 66.3 (6.5)   | 64.2 (5.8)  | 67.4 (6.5)  | 66.8 (6.6)               | 66.5 (6.3)                   |
| Females (%)                    | 1029 (58%)   | 211 (62%)   | 222 (65%)   | 362 (49%)                | 234 (67%)                    |
| Years of education             | 5.0 (1.3)    | 5.4 (1.2)   | 5.2(1.4)    | 4.9 (1.3)                | 4.7 (1.4)                    |
| MMSE score                     | 23.5 (5.3)   | 28.2 (1.7)  | 26.6 (2.4)  | 20.2 (5.0)               | 23.1 (5.0)                   |
| APOE-ε4 allele carriers, n (%) | 853 (48%)    | 120 (35%)   | 175 (51%)   | 430 (58%)                | 128 (37%)                    |
| CSF aβ 1-42 (pg/ml)            | 700 (294)    | 942 (280)   | 722 (301)   | 525 (172)                | 815 (273)                    |
| CSF tau (pg/ml)                | 513 (401)    | 313 (194)   | 456 (265)   | 698 (400)                | 380 (493)                    |
| CSF ptau (pg/ml)               | 69 (37)      | 52 (25)     | 67 (33)     | 87 (39)                  | 49 (24)                      |

Abbreviations: SCD, subjective cognitive decline; MCI, Mild Cognitive Impairment; AD, Alzheimer's Disease; APOE, Apolipoprotein E; CSF, cerebrospinal fluid; aβ 1-42, amyloid beta 1-42, n.a. not applicable. Data are mean (SD), unless otherwise specified.

**Supplementary Table 3.** Cut-point according to period of CSF collection

| Year                   | All (n=2462)               | 2001-2007 (n=654)          | 2008-2015 (n=1766) |
|------------------------|----------------------------|----------------------------|--------------------|
| a. All                 | 680 (661-706)              | 615 (573-673)              | 697 (675-723)*     |
| b. No dementia         | 664 (623-712)              | 696 (578-863)              | 672 (628-731)      |
| c. Dementia            | 694 (670-723)              | 610 (567-657) <sup>§</sup> | 715 (687-743)*     |
| d. SCD                 | 621 (526-821)              | 761 (549-1015)             | 638 (538-1136)     |
| e. MCI                 | 696 (653-754)              | 724 (593-834)              | 698 (653-773)      |
| f. Age ≤ 66.5          | 645 (618-676)              | 644 (567-732)              | 666 (661-706)      |
| g. Age >66.5           | 723 (691-761) <sup>#</sup> | 651 (584-724)              | 737 (702-781)      |
| h. APOE-e4 non-carrier | 650 (614-695)              | 597 (529-697)              | 672 (633-712)      |
| i. APOE-e4 carrier     | 716 (684-780)              | 586 (529-672) <sup>§</sup> | 734 (696-780)*     |

\* Statistically significantly different between 2001-2007 and 2008-2015 cut-off.

<sup>§</sup> Statistically significantly different between 2001-2007 and All cut-off.

<sup>#</sup> Statistically significantly different from Age <66.5 subgroup.

**S-Figure 1: Distribution of CSF Aβ42 values according to year of visit**

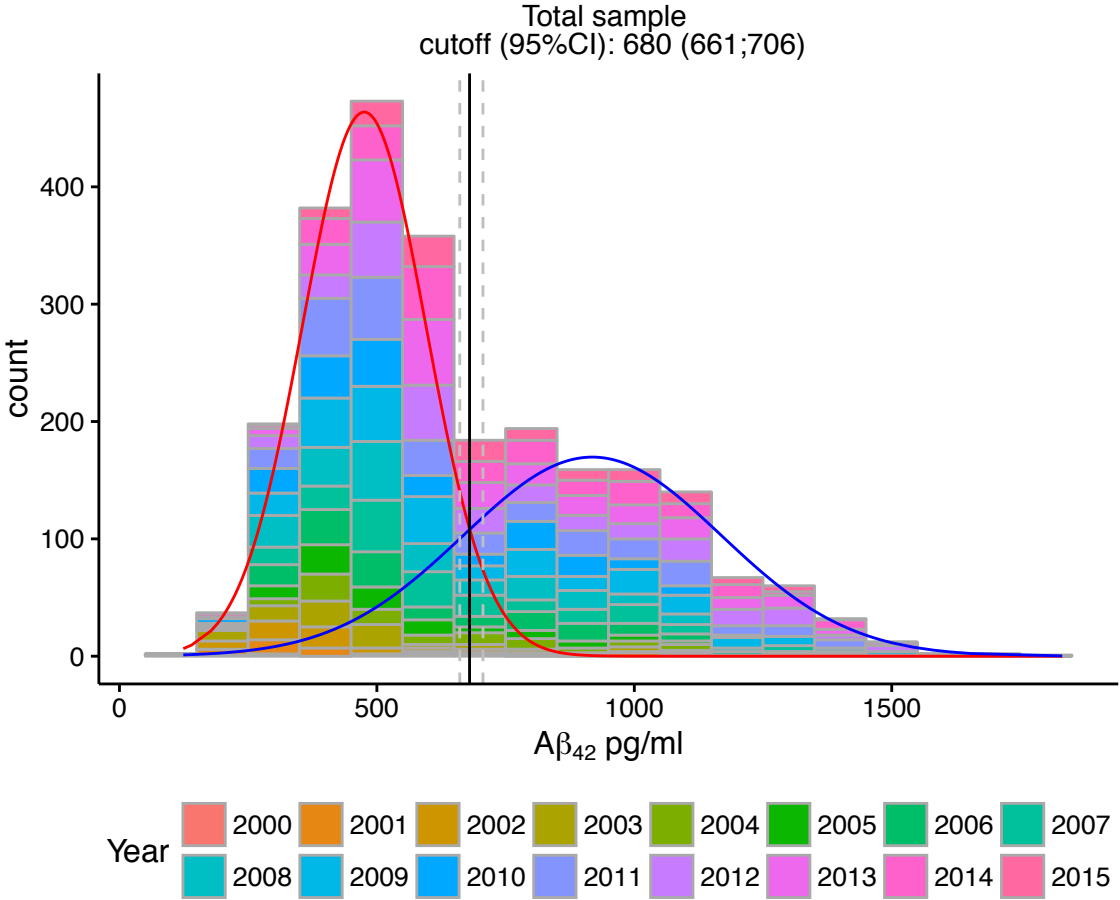

Colours represent the year that CSF samples were obtained.

**S-Figure 2. CSF A $\beta$ <sub>42</sub> cut-off values based on mixture modeling in 2001-2007 subsample**

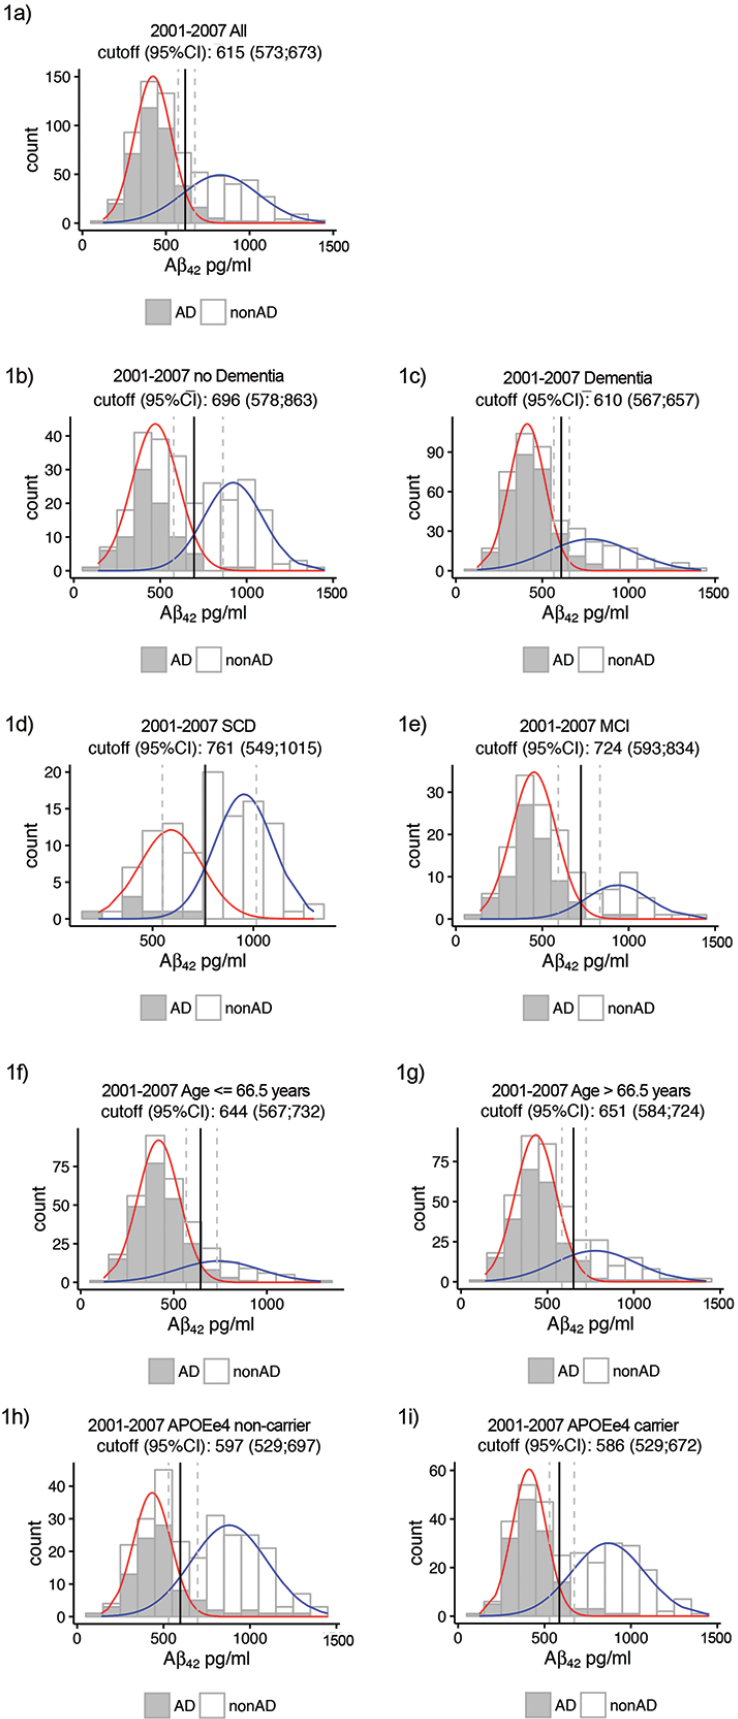

Legend S-Figure 2.

a) Total sample, b) Demented subjects, c) Non demented subjects, d) Subjects with SCD, e) Subjects with MCI, f) Subjects  $\leq 66.5$  years, g) Subjects  $> 66.5$  years, h) APOE- $\epsilon 4$  allele non-carriers i) APOE- $\epsilon 4$  allele carriers. Subjects with a clinical diagnosis of AD-type dementia at baseline or at follow-up (non-demented subjects) are shown in grey.

Abbreviations: SCD, subjective cognitive decline; MCI, Mild Cognitive Impairment; APOE, Apolipoprotein E; AD, Alzheimer's disease.

### S-Figure 3. CSF A $\beta$ <sub>42</sub> cut-off values based on mixture modeling in 2008-2015 subsample

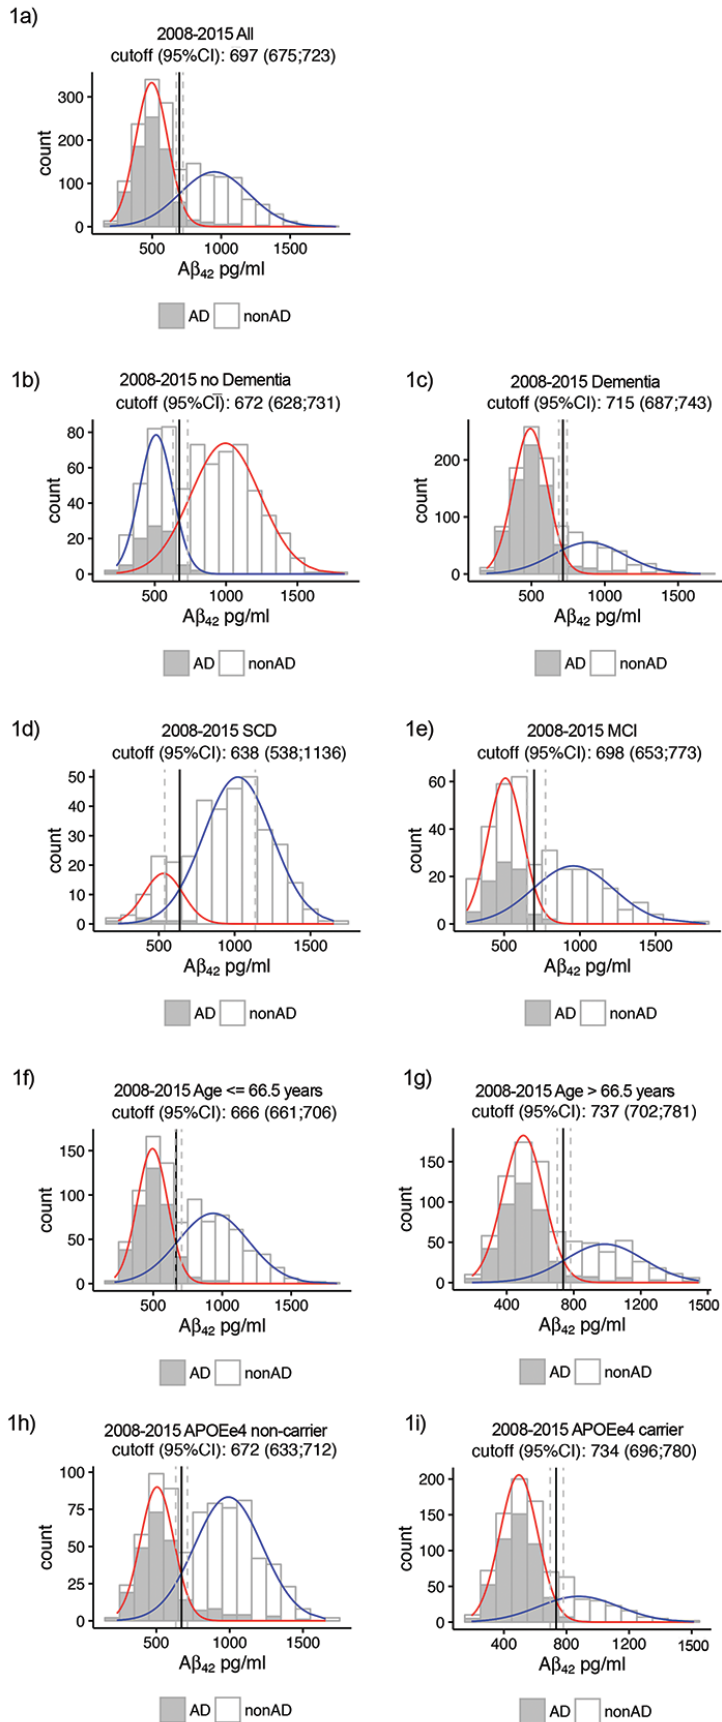



Legend S-Figure 3.

a) Total sample, b) Demented subjects, c) Non demented subjects, d) Subjects with SCD, e) Subjects with MCI, f) Subjects  $\leq 66.5$  years, g) Subjects  $> 66.5$  years, h) APOE- $\epsilon 4$  allele non-carriers i) APOE- $\epsilon 4$  allele carriers. Subjects with a clinical diagnosis of AD-type dementia at baseline or at follow-up (non-demented subjects) are shown in grey.

Abbreviations: SCD, subjective cognitive decline; MCI, Mild Cognitive Impairment; APOE, Apolipoprotein E; AD, Alzheimer's disease.

**S-Figure 4. Effect of sample size on CSF Aβ 42 cut-off and 95% CI**

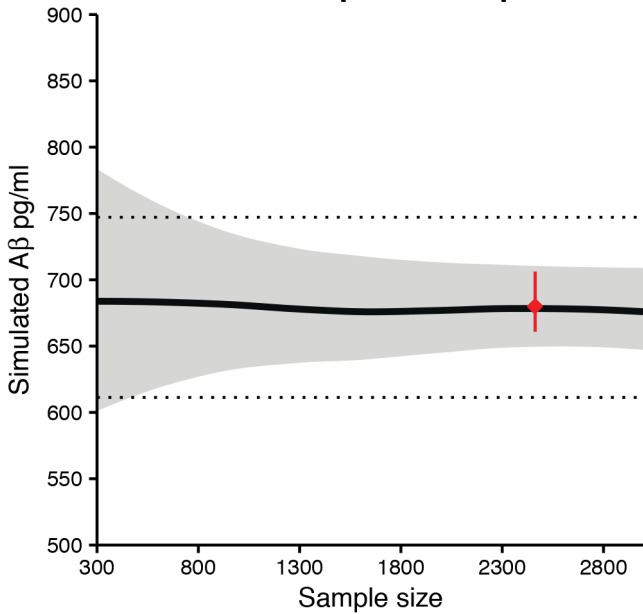

The solid black line represents the mean CSF Aβ 1-42 cut-off per sample size and the grey area represents the 95% CI for that CSF aβ 1-42 cut-off. The dotted lines represent the mean cut-off + or - 10%. The place where the 95% CI crosses the dotted line represents the minimum sample size required (here n=800) to obtain a cut-off of which the 95% CI is within 10% of the mean cut-off. Our data-driven cut-off with 95% CI is represented in red. The modeling was performed in population of which 55% had abnormal CSF aβ 1-42 and 45% normal levels. Abbreviations: aβ 1-42, amyloid beta 1-42.
